# Supplementary material for: Association of sleep duration in middle and old age with incidence of dementia
Source: PubMed Central journal article supplement (PMC8058039; doi:10.1038/s41467-021-22354-2), 2021-04-20
Supplement: 41467_2021_22354_MOESM1_ESM.pdf [file 41467_2021_22354_MOESM1_ESM.pdf]

# Association of sleep duration in middle and old age with incidence of dementia

Séverine Sabia, Aurore Fayosse, Julien Dumurgier, Vincent T. van Hees, Claire Paquet, Andrew Sommerlad, Mika Kivimäki, Aline Dugravot, Archana Singh-Manoux

## Supplementary material content

Supplementary Figure 1. Nelson-Aalen cumulative hazards of dementia by sleep duration at age 50, 60, and 70

Supplementary Table 1. Sample characteristics at age 60 and 70

Supplementary Table 2. Sample characteristics of the accelerometer substudy in 2012-2013

Supplementary Table 3. Sensitivity analysis: use of APOE $\epsilon$ 4 as a covariate in the analysis

Supplementary Table 4. Sensitivity analysis: association of sleep duration with a proxy for Alzheimer's disease dementia

Supplementary Figure 1. Nelson-Aalen cumulative hazards of dementia by sleep duration at age 50, 60, and 70

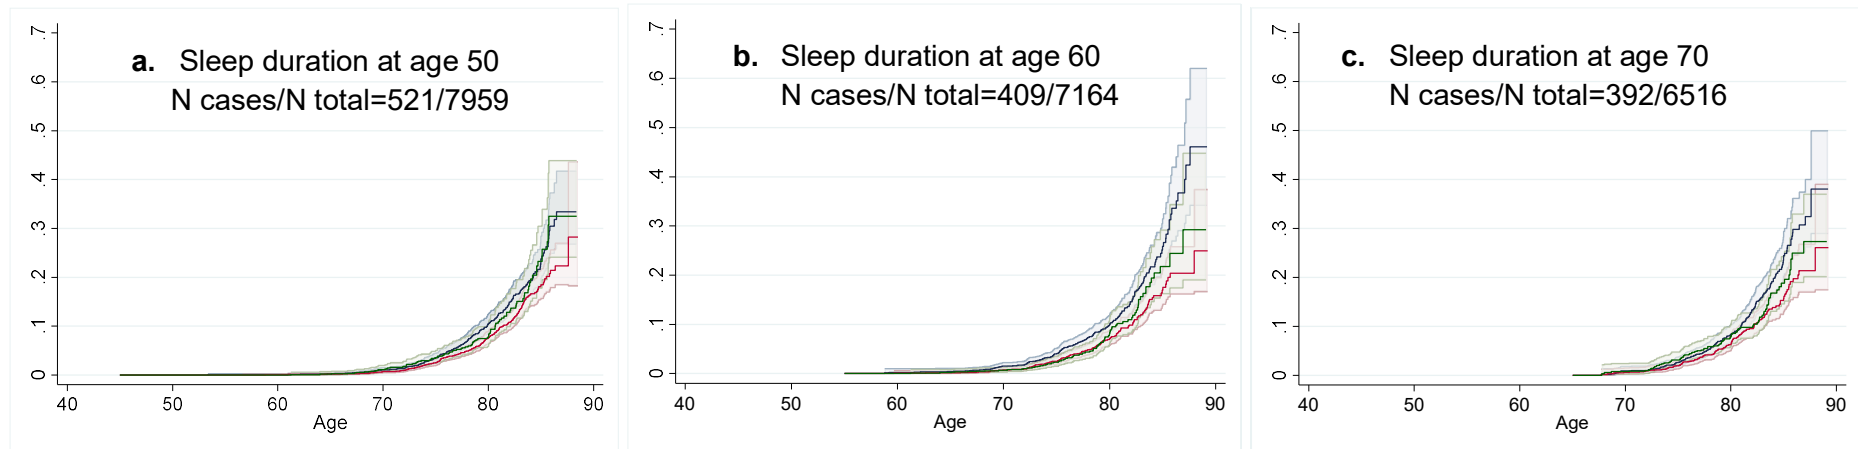

**a** represents Nelson-Aalen cumulative hazards of dementia and the corresponding 95% confidence interval for each sleep duration group defined at age 50 (dark blue, sleep duration  $\leq 6$  hours (N cases/N total=211/3149); red, sleep duration = 7 hours (N cases/N total=219/3624); green, sleep duration  $\geq 8$  hours (N cases/N total=91/1186))

**b** represents Nelson-Aalen cumulative hazards of dementia and the corresponding 95% confidence interval for each sleep duration group defined at age 60 (dark blue, sleep duration  $\leq 6$  hours (N cases/N total=192/2759); red, sleep duration = 7 hours (N cases/N total=142/2988); green, sleep duration  $\geq 8$  hours (N cases/N total=75/1417))

**c** represents Nelson-Aalen cumulative hazards of dementia and the corresponding 95% confidence interval for each sleep duration group defined at age 70 (dark blue, sleep duration  $\leq 6$  hours (N cases/N total=171/2429); red, sleep duration = 7 hours (N cases/N total=131/2578); green, sleep duration  $\geq 8$  hours (N cases/N total=90/1509))

Supplementary Table 1. Sample characteristics at age 60 and 70

|                                                       | Sleep duration at age 60 |                    |                   |        | Sleep duration at age 70 |                    |                   |        |
|-------------------------------------------------------|--------------------------|--------------------|-------------------|--------|--------------------------|--------------------|-------------------|--------|
|                                                       | Short:<br>≤6 hours       | Normal:<br>7 hours | Long:<br>≥8 hours | P      | Short:<br>≤6 hours       | Normal:<br>7 hours | Long:<br>≥8 hours | P      |
| N                                                     | 2759                     | 2988               | 1417              |        | 2429                     | 2578               | 1509              |        |
| Women                                                 | 911 (33.0)               | 829 (27.7)         | 412 (29.1)        | <0.001 | 878 (36.2)               | 653 (25.3)         | 394 (26.1)        | <0.001 |
| Ethnicity, Non-white                                  | 283 (10.3)               | 195 (6.5)          | 104 (7.3)         | <0.001 | 254 (10.5)               | 165 (6.4)          | 117 (7.8)         | <0.001 |
| Less than secondary school diploma                    | 1261 (45.7)              | 1282 (42.9)        | 605 (42.7)        | 0.06   | 1175 (48.4)              | 1125 (43.6)        | 658 (43.6)        | 0.001  |
| Married/cohabiting                                    | 1980 (71.8)              | 2345 (78.5)        | 1129 (79.7)       | <0.001 | 1642 (67.6)              | 1995 (77.4)        | 1194 (79.1)       | <0.001 |
| Moderate alcohol drinking                             | 1403 (50.9)              | 1583 (53.0)        | 740 (52.2)        | 0.27   | 1259 (51.8)              | 1468 (56.9)        | 782 (51.8)        | <0.001 |
| Current smokers                                       | 272 (9.9)                | 261 (8.7)          | 130 (9.2)         | 0.34   | 131 (5.4)                | 119 (4.6)          | 80 (5.3)          | 0.41   |
| Moderate-to-vigorous physical activity (hours), M(SD) | 3.4 (3.4)                | 3.8 (3.5)          | 4.0 (3.7)         | <0.001 | 3.2 (3.3)                | 4.0 (3.5)          | 3.9 (3.9)         | <0.001 |
| Daily fruit and vegetable consumption                 | 2022 (73.3)              | 2283 (76.4)        | 1105 (78.0)       | 0.001  | 1813 (74.6)              | 2102 (81.5)        | 1220 (80.9)       | <0.001 |
| BMI≥30 kg/m <sup>2</sup>                              | 572 (20.7)               | 472 (15.8)         | 213 (15.0)        | <0.001 | 549 (22.6)               | 441 (17.1)         | 297 (19.7)        | <0.001 |
| Diabetes                                              | 249 (9.1)                | 184 (6.2)          | 98 (6.9)          | <0.001 | 362 (14.9)               | 310 (12.0)         | 196 (13.0)        | 0.01   |
| Hypertension                                          | 1062 (38.5)              | 1107 (37.1)        | 526 (37.1)        | 0.48   | 1343 (55.3)              | 1361 (52.8)        | 813 (53.9)        | 0.21   |
| Cardiovascular disease                                | 267 (9.7)                | 231 (7.7)          | 113 (8.0)         | 0.02   | 445 (18.3)               | 346 (13.4)         | 250 (16.6)        | <0.001 |
| GHQ depression                                        | 415 (15.0)               | 252 (8.4)          | 110 (7.8)         | <0.001 | 338 (13.9)               | 158 (6.1)          | 106 (7.0)         | <0.001 |
| CNS medications                                       | 160 (5.8)                | 120 (4.0)          | 84 (5.9)          | 0.002  | 167 (6.9)                | 123 (4.8)          | 121 (8.0)         | <0.001 |
| Mental disorders before age 65                        | 239 (8.7)                | 209 (7.0)          | 129 (9.1)         | 0.02   | 192 (7.9)                | 160 (6.2)          | 118 (7.8)         | 0.04   |

Abbreviations: BMI, body mass index; CNS, central nervous system; GHQ, general health questionnaire; M, mean; SD, standard deviation.

Values are No. (%) unless stated otherwise. Two-sided Ps for heterogeneity were estimated using  $\chi^2$  test for categorical variables, and ANOVA for continuous variables.

Supplementary Table 2. Sample characteristics of the accelerometer substudy in 2012-2013

|                                                          | Sleep duration in 2012-2013              |                                         |                                         | P      |
|----------------------------------------------------------|------------------------------------------|-----------------------------------------|-----------------------------------------|--------|
|                                                          | Tertile 1<br>1 h 16 min<br>to 6 h 13 min | Tertile 2<br>6 h 14 min<br>to 7 h 0 min | Tertile 3<br>7 h 1 min to<br>10 h 6 min |        |
| N                                                        | 1296                                     | 1296                                    | 1296                                    |        |
| Age, M(SD)                                               | 69.4 (5.7)                               | 69.3 (5.7)                              | 69.3 (5.7)                              | 0.94   |
| Women                                                    | 279 (21.5)                               | 362 (27.9)                              | 369 (28.5)                              | <0.001 |
| Ethnicity, Non-white                                     | 126 (9.7)                                | 75 (5.8)                                | 81 (6.3)                                | <0.001 |
| Less than secondary school diploma                       | 524 (40.4)                               | 544 (42.0)                              | 537 (41.4)                              | 0.72   |
| Married/cohabiting                                       | 924 (71.3)                               | 973 (75.1)                              | 1014 (78.2)                             | <0.001 |
| Moderate alcohol drinking                                | 719 (55.5)                               | 774 (59.7)                              | 716 (55.3)                              | 0.04   |
| Current smokers                                          | 50 (3.9)                                 | 42 (3.2)                                | 30 (2.3)                                | 0.08   |
| Moderate-to-vigorous physical activity (hours),<br>M(SD) | 3.4 (3.6)                                | 3.6 (3.8)                               | 3.6 (3.4)                               | 0.14   |
| Daily fruit and vegetable consumption                    | 987 (76.2)                               | 1060 (81.8)                             | 1042 (80.4)                             | 0.001  |
| BMI $\geq$ 30 kg/m <sup>2</sup>                          | 284 (21.9)                               | 211 (16.3)                              | 208 (16.1)                              | <0.001 |
| Diabetes                                                 | 189 (14.6)                               | 150 (11.6)                              | 159 (12.3)                              | 0.06   |
| Hypertension                                             | 688 (53.1)                               | 680 (52.5)                              | 651 (50.2)                              | 0.31   |
| Cardiovascular disease                                   | 222 (17.1)                               | 203 (15.7)                              | 213 (16.4)                              | 0.60   |
| GHQ depression                                           | 114 (8.8)                                | 111 (8.6)                               | 97 (7.5)                                | 0.43   |
| CNS medications                                          | 76 (5.9)                                 | 65 (5.0)                                | 100 (7.7)                               | 0.01   |
| Mental disorders before age 65                           | 95 (7.3)                                 | 95 (7.3)                                | 122 (9.4)                               | 0.08   |

Abbreviations: BMI, body mass index; CNS, central nervous system; GHQ, general health questionnaire; M, mean; SD, standard deviation.

Values are No. (%) unless stated otherwise. Two-sided Ps for heterogeneity were estimated using  $\chi^2$  test for categorical variables, and ANOVA for continuous variables.

Supplementary Table 3. Sensitivity analysis: use of APOEε4 as a covariate in the analysis

|                                                             | N cases/<br>N total | Model not adjusted for<br>APOEε4 |                      | Model adjusted for<br>APOEε4 |                      |
|-------------------------------------------------------------|---------------------|----------------------------------|----------------------|------------------------------|----------------------|
|                                                             |                     | HR <sup>a</sup> (95% CI)         | P-value <sup>b</sup> | HR <sup>c</sup> (95% CI)     | P-value <sup>b</sup> |
| <b>Sleep duration at age 50</b>                             |                     |                                  |                      |                              |                      |
| Short: ≤ 6 hours                                            | 113/1961            | 1.27 (0.98-1.65)                 | 0.07                 | 1.25 (0.96-1.62)             | 0.10                 |
| Normal: 7 hours                                             | 121/2322            | 1 (ref)                          |                      | 1 (ref)                      |                      |
| Long: ≥ 8 hours                                             | 41/693              | 1.24 (0.87-1.77)                 | 0.24                 | 1.23 (0.86-1.76)             | 0.25                 |
| <b>Sleep duration at age 60</b>                             |                     |                                  |                      |                              |                      |
| Short: ≤ 6 hours                                            | 119/1926            | 1.42 (1.08-1.87)                 | 0.01                 | 1.42 (1.08-1.86)             | 0.01                 |
| Normal: 7 hours                                             | 95/2260             | 1 (ref)                          |                      | 1 (ref)                      |                      |
| Long: ≥ 8 hours                                             | 52/1039             | 1.19 (0.84-1.66)                 | 0.33                 | 1.21 (0.86-1.70)             | 0.27                 |
| <b>Sleep duration at age 70</b>                             |                     |                                  |                      |                              |                      |
| Short: ≤ 6 hours                                            | 114/1768            | 1.14 (0.87-1.49)                 | 0.35                 | 1.12 (0.85-1.47)             | 0.41                 |
| Normal: 7 hours                                             | 103/1990            | 1 (ref)                          |                      | 1 (ref)                      |                      |
| Long: ≥ 8 hours                                             | 56/1135             | 0.90 (0.65-1.25)                 | 0.54                 | 0.93 (0.67-1.29)             | 0.65                 |
| <b>Trajectories of sleep duration between age 50 and 70</b> |                     |                                  |                      |                              |                      |
| Persistent short                                            | 59/947              | 1.14 (0.82-1.59)                 | 0.42                 | 1.12 (0.81-1.56)             | 0.49                 |
| Persistent normal                                           | 103/1894            | 1 (ref)                          |                      | 1 (ref)                      |                      |
| Persistent long                                             | 19/334              | 0.95 (0.58-1.57)                 | 0.85                 | 0.95 (0.58-1.57)             | 0.85                 |
| Change from short<br>to normal                              | 49/850              | 1.29 (0.92-1.83)                 | 0.14                 | 1.22 (0.86-1.72)             | 0.26                 |
| Change from<br>normal to long                               | 28/721              | 0.80 (0.52-1.22)                 | 0.29                 | 0.82 (0.54-1.25)             | 0.36                 |
| Change from<br>normal to short                              | 21/320              | 1.00 (0.62-1.60)                 | 0.99                 | 0.94 (0.58-1.51)             | 0.79                 |
| <b>Accelerometer-assessed sleep duration</b>                |                     |                                  |                      |                              |                      |
| Tertile 1: 1 h 16<br>min to 6 h 13 min                      | 42/1040             | 1.66 (1.00-2.75)                 | 0.05                 | 1.62 (0.97-2.69)             | 0.07                 |
| Tertile 2: 6 h 14<br>min to 7 h 0 min                       | 25/1094             | 1 (ref)                          |                      | 1 (ref)                      |                      |
| Tertile 3: 7 h 1 min<br>to 10 h 6 min                       | 19/1093             | 0.67 (0.36-1.23)                 | 0.20                 | 0.69 (0.37-1.27)             | 0.23                 |

Abbreviations: CI, confidence intervals; HR, hazard ratio; IPW, inverse probability weighting.

<sup>a</sup> HR estimated from a Cox regression adjusted for age (time-scale), sex, ethnicity, education, and marital status, alcohol consumption, physical activity, smoking status, and fruit and vegetable consumption, BMI, hypertension, diabetes, CVD, GHQ depression, and CNS medications.

<sup>b</sup> Two-sided P-value for HR in comparison with the reference (ref) category, without adjustment for multiple comparisons.

<sup>c</sup> Model additionally adjusted for APOE ε4 (1 or 2, versus 0) allele.

Supplementary Table 4. Sensitivity analysis: association of sleep duration with a proxy for Alzheimer's disease dementia

|                                                             | All cause dementia |                          |                      | Alzheimer's disease type of dementia <sup>a</sup> |                          |                      |
|-------------------------------------------------------------|--------------------|--------------------------|----------------------|---------------------------------------------------|--------------------------|----------------------|
|                                                             | N cases/ N total   | HR <sup>b</sup> (95% CI) | P-value <sup>c</sup> | N cases/ N total                                  | HR <sup>c</sup> (95% CI) | P-value <sup>c</sup> |
| <b>Sleep duration at age 50</b>                             |                    |                          |                      |                                                   |                          |                      |
| Short: ≤ 6 hours                                            | 211/3149           | 1.22 (1.01-1.48)         | 0.04                 | 159/3149                                          | 1.13 (0.91-1.40)         | 0.27                 |
| Normal: 7 hours                                             | 219/3624           | 1 (ref)                  |                      | 178/3624                                          | 1 (ref)                  |                      |
| Long: ≥ 8 hours                                             | 91/1186            | 1.25 (0.98-1.60)         | 0.07                 | 67/1186                                           | 1.13 (0.85-1.50)         | 0.39                 |
| <b>Sleep duration at age 60</b>                             |                    |                          |                      |                                                   |                          |                      |
| Short: ≤ 6 hours                                            | 192/2759           | 1.37 (1.10-1.72)         | 0.005                | 147/2759                                          | 1.27 (0.99-1.63)         | 0.06                 |
| Normal: 7 hours                                             | 142/2988           | 1 (ref)                  |                      | 119/2988                                          | 1 (ref)                  |                      |
| Long: ≥ 8 hours                                             | 75/1417            | 1.15 (0.87-1.52)         | 0.34                 | 58/1417                                           | 1.06 (0.77-1.45)         | 0.72                 |
| <b>Sleep duration at age 70</b>                             |                    |                          |                      |                                                   |                          |                      |
| Short: ≤ 6 hours                                            | 171/2429           | 1.24 (0.98-1.57)         | 0.10                 | 131/2429                                          | 1.22 (0.94-1.59)         | 0.14                 |
| Normal: 7 hours                                             | 131/2578           | 1 (ref)                  |                      | 105/2578                                          | 1 (ref)                  |                      |
| Long: ≥ 8 hours                                             | 90/1509            | 1.15 (0.88-1.51)         | 0.60                 | 68/1509                                           | 1.11 (0.81-1.51)         | 0.52                 |
| <b>Trajectories of sleep duration between age 50 and 70</b> |                    |                          |                      |                                                   |                          |                      |
| Persistent short                                            | 103/1358           | 1.30 (1.00-1.69)         | 0.048                | 78/1358                                           | 1.22 (0.91-1.64)         | 0.19                 |
| Persistent normal                                           | 141/2520           | 1 (ref)                  |                      | 116/2520                                          | 1 (ref)                  |                      |
| Persistent long                                             | 35/461             | 1.28 (0.88-1.85)         | 0.20                 | 27/461                                            | 1.20 (0.79-1.83)         | 0.40                 |
| Change from short to normal                                 | 61/1086            | 1.20 (0.89-1.63)         | 0.23                 | 46/1086                                           | 1.11 (0.78-1.56)         | 0.56                 |
| Change from normal to long                                  | 47/946             | 1.02 (0.73-1.42)         | 0.90                 | 37/946                                            | 1.00 (0.69-1.45)         | 0.99                 |
| Change from normal to short                                 | 39/504             | 1.13 (0.79-1.62)         | 0.50                 | 29/504                                            | 1.06 (0.70-1.61)         | 0.77                 |
| <b>Accelerometer-assessed sleep duration</b>                |                    |                          |                      |                                                   |                          |                      |
| Tertile 1: 1 h 16 min to 6 h 13 min                         | 53/1296            | 1.63 (1.04-2.57)         | 0.03                 | 43/1296                                           | 1.56 (0.95-2.55)         | 0.08                 |
| Tertile 2: 6 h 14 min to 7 h 0 min                          | 31/1296            | 1 (ref)                  |                      | 27/1296                                           | 1 (ref)                  |                      |
| Tertile 3: 7 h 1 min to 10 h 6 min                          | 27/1296            | 0.78 (0.46-1.32)         | 0.36                 | 18/1296                                           | 0.61 (0.33-1.11)         | 0.33                 |

Abbreviations: CI, confidence intervals; HR, hazard ratio; IPW, inverse probability weighting.

<sup>a</sup> Alzheimer's type of dementia definition is based on dementia cases without cardiovascular disease history (stroke or myocardial infarction).

<sup>b</sup> HR estimated from a Cox regression adjusted for age (time-scale), sex, ethnicity, education, and marital status, alcohol consumption, physical activity, smoking status, and fruit and vegetable consumption, BMI, hypertension, diabetes, CVD, GHQ depression, and CNS medications.

<sup>c</sup> Two-sided P-value for HR in comparison with the reference (ref) category, without adjustment for multiple comparisons.

Supplementary STROBE Statement—checklist of items that should be included in reports of observational studies

|                           | Item No. | Recommendation                                                                                                                                                                                                                                                                                                                                                                                                                                                                 | Page No. | Relevant text from manuscript                                                     |
|---------------------------|----------|--------------------------------------------------------------------------------------------------------------------------------------------------------------------------------------------------------------------------------------------------------------------------------------------------------------------------------------------------------------------------------------------------------------------------------------------------------------------------------|----------|-----------------------------------------------------------------------------------|
| <b>Title and abstract</b> | 1        | (a) Indicate the study's design with a commonly used term in the title or the abstract                                                                                                                                                                                                                                                                                                                                                                                         | 1        | Association of sleep duration in middle and old age with incidence of dementia    |
|                           |          | (b) Provide in the abstract an informative and balanced summary of what was done and what was found                                                                                                                                                                                                                                                                                                                                                                            | 2        | See details on page 2                                                             |
| <b>Introduction</b>       |          |                                                                                                                                                                                                                                                                                                                                                                                                                                                                                |          |                                                                                   |
| Background/rationale      | 2        | Explain the scientific background and rationale for the investigation being reported                                                                                                                                                                                                                                                                                                                                                                                           | 3        | Two first paragraphs of page 3                                                    |
| Objectives                | 3        | State specific objectives, including any prespecified hypotheses                                                                                                                                                                                                                                                                                                                                                                                                               | 3        | Third paragraph of page 3                                                         |
| <b>Methods</b>            |          |                                                                                                                                                                                                                                                                                                                                                                                                                                                                                |          |                                                                                   |
| Study design              | 4        | Present key elements of study design early in the paper                                                                                                                                                                                                                                                                                                                                                                                                                        | 11       | Paragraph on study population                                                     |
| Setting                   | 5        | Describe the setting, locations, and relevant dates, including periods of recruitment, exposure, follow-up, and data collection                                                                                                                                                                                                                                                                                                                                                | 11 to 13 | Paragraph on study population, sleep duration, and dementia                       |
| Participants              | 6        | (a) <i>Cohort study</i> —Give the eligibility criteria, and the sources and methods of selection of participants. Describe methods of follow-up<br><br><i>Case-control study</i> —Give the eligibility criteria, and the sources and methods of case ascertainment and control selection. Give the rationale for the choice of cases and controls<br><br><i>Cross-sectional study</i> —Give the eligibility criteria, and the sources and methods of selection of participants | 11       | Paragraph on study population + flow chart of the study in Supplementary Figure 1 |
|                           |          | (b) <i>Cohort study</i> —For matched studies, give matching criteria and number of exposed and unexposed<br><br><i>Case-control study</i> —For matched studies, give matching criteria and the number of controls per case                                                                                                                                                                                                                                                     |          |                                                                                   |
| Variables                 | 7        | Clearly define all outcomes, exposures, predictors, potential confounders, and effect modifiers. Give diagnostic criteria, if applicable                                                                                                                                                                                                                                                                                                                                       | 11-14    | Paragraphs on sleep duration, dementia, and covariates                            |
| Data sources/measurement  | 8*       | For each variable of interest, give sources of data and details of methods of assessment (measurement). Describe comparability of assessment methods if there is more than one group                                                                                                                                                                                                                                                                                           | 11-14    | Paragraphs on sleep duration, dementia, and covariates                            |
| Bias                      | 9        | Describe any efforts to address potential sources of bias                                                                                                                                                                                                                                                                                                                                                                                                                      | 15       | Use of accelerometer data to account for potential reporting bias                 |

|                        |     |                                                                                                                                                                                                                                                                                                           |       |                                                                                                                                                                                       |
|------------------------|-----|-----------------------------------------------------------------------------------------------------------------------------------------------------------------------------------------------------------------------------------------------------------------------------------------------------------|-------|---------------------------------------------------------------------------------------------------------------------------------------------------------------------------------------|
|                        |     |                                                                                                                                                                                                                                                                                                           |       | and of inverse probability weighting to account for missing data                                                                                                                      |
| Study size             | 10  | Explain how the study size was arrived at                                                                                                                                                                                                                                                                 | 4-5   | First paragraph of the results section + flow chart in Supplementary Figure 1 + last paragraph on page 5                                                                              |
| Quantitative variables | 11  | Explain how quantitative variables were handled in the analyses. If applicable, describe which groupings were chosen and why                                                                                                                                                                              | 11-12 | Paragraph on sleep duration                                                                                                                                                           |
| Statistical methods    | 12  | (a) Describe all statistical methods, including those used to control for confounding                                                                                                                                                                                                                     | 14    | First paragraph of page 14.                                                                                                                                                           |
|                        |     | (b) Describe any methods used to examine subgroups and interactions                                                                                                                                                                                                                                       | 4, 28 | No evidence of interaction between sex and variables of interest, exclusion of history of mental disorders was also considered (table 4)                                              |
|                        |     | (c) Explain how missing data were addressed                                                                                                                                                                                                                                                               | 15    | Missing data on the exposure variable (sleep duration) was accounted for by conducted a sensitivity analysis using inverse probability weighting (page 15, 3 <sup>rd</sup> paragraph) |
|                        |     | (d) <i>Cohort study</i> —If applicable, explain how loss to follow-up was addressed<br><i>Case-control study</i> —If applicable, explain how matching of cases and controls was addressed<br><i>Cross-sectional study</i> —If applicable, describe analytical methods taking account of sampling strategy | 11    | There was no problem of loss of follow-up as dementia was ascertained using linkage to electronic health records for all participants.                                                |
|                        |     | (e) Describe any sensitivity analyses                                                                                                                                                                                                                                                                     | 15    | Third paragraph of page 15                                                                                                                                                            |
| <b>Results</b>         |     |                                                                                                                                                                                                                                                                                                           |       |                                                                                                                                                                                       |
| Participants           | 13* | (a) Report numbers of individuals at each stage of study—eg numbers potentially eligible, examined for eligibility, confirmed eligible, included in the study, completing follow-up, and analysed                                                                                                         | 4     | First paragraph of the results section, Supplementary Figure 1                                                                                                                        |
|                        |     | (b) Give reasons for non-participation at each stage                                                                                                                                                                                                                                                      | 4     | First paragraph of the results section, Supplementary Figure 1                                                                                                                        |
|                        |     | (c) Consider use of a flow diagram                                                                                                                                                                                                                                                                        | 4     | Supplementary Figure 1                                                                                                                                                                |



|                   |     |                                                                                                                                                                                                              |                 |                                                                                                                                                              |
|-------------------|-----|--------------------------------------------------------------------------------------------------------------------------------------------------------------------------------------------------------------|-----------------|--------------------------------------------------------------------------------------------------------------------------------------------------------------|
| Descriptive data  | 14* | (a) Give characteristics of study participants (eg demographic, clinical, social) and information on exposures and potential confounders                                                                     | 4               | Second paragraph of the results section                                                                                                                      |
|                   |     | (b) Indicate number of participants with missing data for each variable of interest                                                                                                                          | 4               | Supplementary Figure 1                                                                                                                                       |
|                   |     | (c) <i>Cohort study</i> —Summarise follow-up time (eg, average and total amount)                                                                                                                             | 5 - 6 + 26 - 29 | Tables 2 to 5 footnotes as well as in the results sections                                                                                                   |
| Outcome data      | 15* | <i>Cohort study</i> —Report numbers of outcome events or summary measures over time                                                                                                                          | 5 - 6 + 26 - 29 | Tables 2 to 5 footnotes as well as in the results sections                                                                                                   |
|                   |     | <i>Case-control study</i> —Report numbers in each exposure category, or summary measures of exposure                                                                                                         |                 |                                                                                                                                                              |
|                   |     | <i>Cross-sectional study</i> —Report numbers of outcome events or summary measures                                                                                                                           |                 |                                                                                                                                                              |
| Main results      | 16  | (a) Give unadjusted estimates and, if applicable, confounder-adjusted estimates and their precision (eg, 95% confidence interval). Make clear which confounders were adjusted for and why they were included | 26 - 29         | Tables 2 to 5 : Several levels of adjustment are provided in the tables for HR as well as unadjusted incident rate.                                          |
|                   |     | (b) Report category boundaries when continuous variables were categorized                                                                                                                                    | 29              | Boundaries of tertiles of sleep duration assessed by accelerometer data are provided in table 5. Sleep duration in tables 1 to 4 was a categorical variable. |
|                   |     | (c) If relevant, consider translating estimates of relative risk into absolute risk for a meaningful time period                                                                                             |                 | Tables 2, 3, and 5 include incidence rate as well as HRs                                                                                                     |
| Other analyses    | 17  | Report other analyses done—eg analyses of subgroups and interactions, and sensitivity analyses                                                                                                               | 6-7             | Sensitivity analyses are described in the Sensitivity analysis paragraphs of the Results section                                                             |
| <b>Discussion</b> |     |                                                                                                                                                                                                              |                 |                                                                                                                                                              |
| Key results       | 18  | Summarise key results with reference to study objectives                                                                                                                                                     | 7               | First paragraph of the discussion section                                                                                                                    |
| Limitations       | 19  | Discuss limitations of the study, taking into account sources of potential bias or imprecision. Discuss both direction and magnitude of any potential bias                                                   | 10              | See sections on strengths and limitations of the study                                                                                                       |

|                          |    |                                                                                                                                                                            |       |                                          |
|--------------------------|----|----------------------------------------------------------------------------------------------------------------------------------------------------------------------------|-------|------------------------------------------|
| Interpretation           | 20 | Give a cautious overall interpretation of results considering objectives, limitations, multiplicity of analyses, results from similar studies, and other relevant evidence | 10-11 | Last paragraph of the discussion section |
| Generalisability         | 21 | Discuss the generalisability (external validity) of the study results                                                                                                      | 10    | See 2 <sup>nd</sup> paragraph of page 10 |
| <b>Other information</b> |    |                                                                                                                                                                            |       |                                          |
| Funding                  | 22 | Give the source of funding and the role of the funders for the present study and, if applicable, for the original study on which the present article is based              | 22    | See page 22 for funding section          |

\*Give information separately for cases and controls in case-control studies and, if applicable, for exposed and unexposed groups in cohort and cross-sectional studies.

**Note:** An Explanation and Elaboration article discusses each checklist item and gives methodological background and published examples of transparent reporting. The STROBE checklist is best used in conjunction with this article (freely available on the Web sites of PLoS Medicine at <http://www.plosmedicine.org/>, Annals of Internal Medicine at <http://www.annals.org/>, and Epidemiology at <http://www.epidem.com/>). Information on the STROBE Initiative is available at [www.strobe-statement.org](http://www.strobe-statement.org).
